# 1 **Tracktor: image-based automated tracking of animal movement and** 2 **behaviour**

3

4 Vivek Hari Sridhar<sup>1,2</sup>, Dominique G. Roche<sup>3</sup>, Simon Gingins<sup>1,2</sup>

5

6 <sup>1</sup> *Department of Collective Behaviour, Max Planck Institute for Ornithology, Konstanz, Germany*

7 <sup>2</sup> *Department of Biology, University of Konstanz, Konstanz, Germany*

8 <sup>3</sup> *Institute of Biology, University of Neuchâtel, 2000 Neuchâtel, Switzerland*

9

10 E-mail for correspondence: [vivekhsridhar@gmail.com](mailto:vivekhsridhar@gmail.com)

11

## 12 **Abstract**

13 1. Automated movement tracking is essential for high-throughput quantitative analyses of  
14 the behaviour and kinematics of organisms. Automated tracking also improves replicability  
15 by avoiding observer biases and allowing reproducible workflows. However, few automated  
16 tracking programs exist that are open access, open source, and capable of tracking  
17 unmarked organisms in noisy environments.

18

19 2. *Tracktor* is an image-based tracking freeware designed to perform single-object tracking  
20 in noisy environments, or multi-object tracking in uniform environments while maintaining  
21 individual identities. *Tracktor* is code-based but requires no coding skills other than the user  
22 being able to specify tracking parameters in a designated location, much like in a graphical  
23 user interface (GUI). The installation and use of the software is fully detailed in a user  
24 manual.

25

26 3. Through four examples of common tracking problems, we show that Tracktor is able to  
27 track a variety of animals in diverse conditions. The main strengths of Tracktor lie in its  
28 ability to track single individuals under noisy conditions (e.g. when the object shape is  
29 distorted), its robustness to perturbations (e.g. changes in lighting conditions during the  
30 experiment), and its capacity to track multiple individuals while maintaining their identities.  
31 Additionally, summary statistics and plots allow measuring and visualizing common metrics  
32 used in the analysis of animal movement (e.g. cumulative distance, speed, acceleration,  
33 activity, time spent in specific areas, distance to neighbour, etc.).

34

35 4. *Tracktor* is a versatile, reliable, easy-to-use automated tracking software that is  
36 compatible with all operating systems and provides many features not available in other  
37 existing freeware. Access *Tracktor* and the complete user manual here:

38 <https://github.com/vivekhsridhar/tracktor>

39

40 **Keywords:** collective behaviour, fast start escape response, locomotion, kinematics, choice  
41 experiment, video analysis software

## 42 **1. Introduction**

43 Quantifying animal movement is central to answering numerous research questions in  
44 ethology, behavioural ecology, ecophysiology, biomechanics, neuroscience and evolutionary  
45 ecology. Movement is also increasingly used as a proxy to evaluate sub-lethal effects of  
46 pharmaceuticals, climate change and other anthropogenic stressors on animals, thereby  
47 improving our understanding of contemporary environmental and health issues of global  
48 importance (Wong & Candolin, 2015; Tucker et al., 2018). As such, researchers in diverse  
49 fields of science require methods allowing non-invasive measurement of movement, in  
50 different environments, across many animals simultaneously, and with high precision and  
51 accuracy (Dell et al., 2014).

52

53 The field of computer vision now allows researchers to automatically track subjects in a  
54 variety of contexts (Dell et al., 2014). Such automated tracking techniques drastically reduce  
55 the time and effort required to extract image-based data, allowing researchers to generate  
56 large and highly detailed datasets of animal movement and behaviour (e.g. Mersch, Crespi,  
57 & Keller, 2013; Attanasi et al., 2014). Methods for automated tracking abound in the  
58 computer vision literature, yet researchers often lack the know-how to implement these  
59 solutions for their specific tracking needs. Without a programming background,  
60 implementing such techniques can be daunting, and manual coding via direct observation  
61 often remains a preferred alternative, particularly for small-scale projects (Gomez-Marin,  
62 Paton, Kampff, Costa, & Mainen, 2014). However, while direct observation can produce  
63 informative data, it is often time-consuming, subjective, and challenging to replicate.  
64 Various proprietary software packages have been developed to provide simple automated  
65 tracking options (e.g. Noldus, Spink, & Tegenlenbosch, 2013), but these are expensive and

66 often out of reach for many research groups. Clearly, there is a need for automated tracking  
67 solutions that are free, user-friendly and reliably provide image-based data acquisition  
68 solutions to record movement and behaviour.

69

70 A variety of open access tracking software already exist, designed to provide solutions for  
71 generic (e.g. Pérez-Escudero, Vicente-Page, Hinz, Arganda, & Polavieja, 2014; Rodriguez et  
72 al., 2018) and specific tracking problems (e.g. Branson, Robie, Bender, Perona, & Dickinson,  
73 2009; Hewitt et al., 2018). However, automated tracking is achieved via different  
74 approaches, each one with its own strengths and weaknesses. Here, we propose Tracktor, a  
75 simple, open-source tracking software that can track multiple individuals simultaneously,  
76 single individuals in noisy environments, and produces a range of plots and summary  
77 statistics. Below, we detail its functioning, give examples of applications, and discuss its  
78 strengths and limitations. We also provide a detailed section on optimising video acquisition  
79 in the supplementary material.

80

## 81 **2. Software**

82 Tracktor is a python-based program that uses the OpenCV library (<https://opencv.org/>) for  
83 image processing. Briefly, Tracktor functions as a three-step process (Fig. 1): first, it  
84 automatically detects objects in videos through adaptive thresholding, and isolates the  
85 animals from other objects based on their size; second, it separates individuals from each  
86 other using k-means clustering; third, it maintains individual identities between frames  
87 using the Hungarian algorithm (Kuhn, 1955). A detailed description of the software is  
88 provided in the electronic supplementary material (ESM). There is no GUI (Graphical User  
89 Interface); all the commands are directly sent from scripts. However, all relevant input

90 parameters are clearly explained and grouped in a designated cell at the start of the code,  
91 making Tracktor easy to use (Fig. S1). Additionally, the code is separated into sections and  
92 thoroughly annotated such that it is clear and accessible, even for an audience with minimal  
93 or no coding skills. For example, users with basic knowledge of the R statistical language will  
94 readily be able to use Tracktor. A detailed, step-by-step manual guiding users from  
95 installation to implementation is available on the Git repository:

96 <https://github.com/vivekhsridhar/tracktor>.

97

### 98 **3. Examples of applications**

99 We provide four examples of common animal tracking problems that have successfully been  
100 solved with Tracktor. Each example is fully replicable and comprises annotated code to track  
101 the animals and produce relevant graphs and summary statistics. These examples can serve  
102 as the basis for solving similar tracking problems and can be readily adjusted to suit other  
103 problems with minimal modifications.

104

#### 105 **3.1 Fish fast-start escape response (1 individual)**

106 Fast-start (i.e. burst) swimming performance in fishes is typically assessed by filming their  
107 escape behaviour in response to a mechano-acoustic stimulus falling inside the  
108 experimental tank (Domenici & Blake, 1997). When the stimulus hits the water surface,  
109 waves are created that propagate across the tank (Fig. 2a). These disturbances are  
110 problematic for automated tracking because water movements can be mistakenly detected  
111 as the animal, and several traditional image processing techniques (e.g. background  
112 subtraction) cannot be used in these conditions. As a result, most researchers code videos  
113 manually (e.g. Gingins, Roche, & Bshary, 2017; Shi et al., 2017), which is time consuming and

114 prone to measurement error. Using a high speed (1000 fps) video of an escape response by  
115 the cleaning goby *Elacatinus prochilos*, we show that Tracktor can differentiate between  
116 animal movements and those of other shapes detected as potential objects. We provide  
117 summary statistics that are specific to fast-start analyses, and implement the Savitzky-Golay  
118 filter (Savitzky & Golay, 1964) to smooth noise and avoid erroneous measurements (Fig. 3a-  
119 c).

120

### 121 **3.2 Two-choice flume experiment (1 individual)**

122 Researchers in behavioural ecology and ecotoxicology are often interested in measuring an  
123 animal's avoidance or attraction to a given stimulus (e.g. olfactory or visual cues). Such  
124 choice tests are generally carried out by placing the test subject in a central arena with  
125 various choice options on different sides. The time spent in the vicinity of each option is  
126 then used as a proxy to measure preference or avoidance. Several experiments are based  
127 on this approach, for example to evaluate mate choice, kin and individual recognition, social  
128 tendencies, numerical abilities, and reaction to chemical cues (e.g. Hurst et al., 2001;  
129 Gómez-Laplaza & Gerlai, 2011; Fischer & Frommen, 2013; Jutfelt, Sundin, Raby, Krång, &  
130 Clark, 2017; Macario, Croft, Endler, & Darden, 2017). Here, we use Tracktor to track the  
131 movements of a single cleaning goby (*Elacatinus prochilos*) in a two-current choice flume  
132 with water containing the smells of different habitats. We first track the movements of the  
133 fish throughout the video. Then, we select an area by drawing a rectangle on the image, and  
134 measure the proportion of time the fish spent in the designated area (Fig. 2b).

135

### 136 **3.3 Spider courtship behaviour (2 individuals)**

137 Researchers often place two or more individuals in the same arena and record dyadic  
138 interactions, such as approach and avoidance behaviours. Such tracking problems are  
139 common in mate choice experiments, aggression, and sociability tests (Jolles, Boogert,  
140 Sridhar, Couzin, & Manica, 2017; Macario et al., 2017). Here we simultaneously track a male  
141 and a female spider (*Nephila senegalensis*) during courtship and provide distance between  
142 the two. In this example, Tracktor simultaneously tracks individuals of very different sizes  
143 (male *Nephila* are much smaller than females) and is robust to disturbances in the system.  
144 The key to successfully tracking objects of different sizes simultaneously is to ensure that  
145 the recording area is uncluttered since size thresholding cannot be used to its fullest extent  
146 when non-target objects of similar sizes are present in the arena (see ESM). Towards the  
147 end of the video sequence, the experimenter enters the field of view, casting a shadow on  
148 the setup. This does not affect tracking performance because Tracktor uses adaptive  
149 thresholding to cope with changes in lighting while disregarding the experimenter based on  
150 a specified size rule (see ESM).

151

### 152 **3.4 Termite collective behaviour (8 individuals)**

153 Studying collective behaviour requires recording the movements of multiple individuals  
154 simultaneously, resulting in large datasets. Automated tracking is extremely useful in this  
155 context, and many researchers already use this approach for their research by designing  
156 their own custom tracking solutions (Tunstrøm et al., 2013; Jolles et al., 2017). Here, we  
157 show that Tracktor can simultaneously track 8 termites (*Constrictotermes cyphergaster*) in a  
158 petri dish while maintaining individual identities. The challenge in this example is to  
159 correctly identify individuals: when two termites perform trophallaxis, thresholding results  
160 in the merging of their shapes. The k-means clustering technique implemented in Tracktor

161 (see ESM) allows separating contours into a fixed number of clusters corresponding to the  
162 number of individuals in the video. Summary statistics are provided as standard measures of  
163 collective states such as polarisation and rotation of the group (Fig. 2e; see Couzin, Krause,  
164 James, Ruxton, & Franks, 2002; Tunstrøm et al., 2013).

165

#### 166 **4. Strengths & limitations**

167 Tracktor aims to provide an automated tracking tool that can be applied to many animals  
168 without the use of tags. Similar types of software (e.g. idTracker, Pérez-Escudero et al.,  
169 2014; BioTracker, Mönck et al., 2018; ToxTrac, Rodriguez et al., 2018) already exist, and we  
170 do not claim that Tracktor outperforms other software in all conditions. Rather, we  
171 emphasise that tracking problems and solutions are numerous and varied; hence, Tracktor  
172 provides an alternative that can fill the needs of many researchers when other software are  
173 not adequate. For instance, to our knowledge, Tracktor is the first tool to provide a robust  
174 and complete automated analysis of a fish fast-start escape response.

175

176 One of the common computer vision techniques to detect objects in videos is background  
177 subtraction, which relies on the assumption that the background is static while the animals  
178 to be tracked are mobile. Background subtraction has the advantage that it can deal with  
179 complex backgrounds and uneven illumination. However, if the animals remain static for a  
180 significant amount of time, detection will fail. For example, one of the eight termites  
181 (example 3.4) remained immobile throughout the recording. Additionally, it is not possible  
182 to use this technique when the background itself is moving, such as when measuring escape  
183 responses in fish (example 3.1). Under such conditions, Tracktor is thus likely to perform  
184 better than software using background subtraction (e.g. BioTracker).



185

186 We recognize that Tracktor's lack of a GUI might initially discourage potential users from  
187 using the software. However, the growing prevalence of basic scripting/programming skills  
188 among evolutionary ecologists (e.g. in R) suggests that the absence of a GUI will not  
189 constitute a major impediment to most interested users, particularly given the simplicity of  
190 Tracktor's code and the detailed user manual we provide alongside the software. A (python)  
191 code-based program also offers the additional advantage that it can easily be modified and  
192 improved by the community and run on all operating systems, which is often not the case  
193 for software with a GUI (e.g. ToxTrac).

194

195 Like many other software packages, Tracktor will not perform well if there are occlusions, or  
196 if animals go in and out of the camera's field of view. Solving such problems requires  
197 algorithms that maintain identity by recognising individual features (e.g. idTracker) or assign  
198 IDs to tracklets when tracks are broken (e.g. ToxTrac). Such solutions require more  
199 computing power and result in longer processing times. Therefore, they were not  
200 implemented in the design of Tracktor.

201

## 202 **5. Conclusion**

203 Tracktor is a simple, rapid and versatile solution for many commonly encountered image-  
204 based tracking problems in animal behaviour. The software is robust to disturbances and  
205 allows users to track one or many individuals under a range of experimental conditions.  
206 Automated image-based tracking solutions such as Tracktor can greatly improve the study  
207 of animal movement and behaviour by reducing video processing time, avoiding observer  
208 bias, and allowing transparent, reproducible workflows.

209

## 210 **Acknowledgements**

211 We thank I. D. Couzin and R. Bshary for supporting the development of Tracktor, M. Lampe,  
212 S. F. Garza, H. H. dos Santos and R. Mazzei for providing the example videos, I. D. Couzin and  
213 J. S. McClung for comments on the manuscript, and many colleagues who tested the  
214 software and provided feedback.

215

## 216 **Authors' contributions**

217 All authors designed and planned the study and contributed in writing the manuscript.  
218 V.H.S. developed the software.

219

## 220 **Data accessibility**

221 The data used here are available at <https://github.com/vivekhsridhar/tracktor>.

222

## 223 **References**

224 Attanasi, A., Cavagna, A., Del Castello, L., Giardina, I., Grigera, T. S., Jelić, A., ... Viale, M.

225 (2014). Superfluid transport of information in turning flocks of starlings. *Nature*

226 *Physics*, 10(9), 691–696. doi:10.1038/nphys3035

227 Branson, K., Robie, A. A., Bender, J., Perona, P., & Dickinson, M. H. (2009). High-throughput

228 ethomics in large groups of *Drosophila*. *Nature Methods*, 6(6), 451–457.

229 doi:10.1038/nmeth.1328

230 Couzin, I. D., Krause, J., James, R., Ruxton, G. D., & Franks, N. R. (2002). Collective Memory

231 and Spatial Sorting in Animal Groups. *Journal of Theoretical Biology*, 218(1), 1–11.

232 doi:10.1006/jtbi.2002.3065

- 233 Dell, A. I., Bender, J. A., Branson, K., Couzin, I. D., de Polavieja, G. G., Noldus, L. P. J. J., ...  
234 Brose, U. (2014). Automated image-based tracking and its application in ecology.  
235 *Trends in Ecology & Evolution*, 29(7), 417–428. doi:10.1016/j.tree.2014.05.004
- 236 Domenici, P., & Blake, R. (1997). The kinematics and performance of fish fast-start  
237 swimming. *Journal of Experimental Biology*, 200(8), 1165–1178.
- 238 Fischer, S., & Frommen, J. G. (2013). Eutrophication alters social preferences in three-spined  
239 sticklebacks (*Gasterosteus aculeatus*).  
240 *Behavioral Ecology and Sociobiology*, 67(2), 293–299. doi:10.1007/s00265-012-1449-  
241 6
- 242 Gingins, S., Roche, D. G., & Bshary, R. (2017). Mutualistic cleaner fish maintains high escape  
243 performance despite privileged relationship with predators. *Proceedings of the Royal*  
244 *Society B: Biological Sciences*, 284(1853), 20162469. doi:10.1098/rspb.2016.2469
- 245 Gómez-Laplaza, L. M., & Gerlai, R. (2011). Can angelfish (*Pterophyllum scalare*) count? Discrimination between  
246 different shoal sizes follows Weber's law. *Animal Cognition*, 14(1), 1–9.  
247 doi:10.1007/s10071-010-0337-6
- 248
- 249 Gomez-Marin, A., Paton, J. J., Kampff, A. R., Costa, R. M., & Mainen, Z. F. (2014). Big  
250 behavioral data: psychology, ethology and the foundations of neuroscience. *Nature*  
251 *Neuroscience*, 17(11), 1455–1462. doi:10.1038/nn.3812
- 252 Hewitt, B. M., Yap, M. H., Hodson-Tole, E. F., Kennerley, A. J., Sharp, P. S., & Grant, R. A.  
253 (2018). A novel automated rodent tracker (ART), demonstrated in a mouse model of  
254 amyotrophic lateral sclerosis. *Journal of Neuroscience Methods*, 300, 147–156.  
255 doi:10.1016/j.jneumeth.2017.04.006

- 256 Hurst, J. L., Payne, C. E., Nevison, C. M., Marie, A. D., Humphries, R. E., Robertson, D. H. L., ...  
257 Beynon, R. J. (2001). Individual recognition in mice mediated by major urinary  
258 proteins. *Nature*, *414*(6864), 631–634. doi:10.1038/414631a
- 259 Jolles, J. W., Boogert, N. J., Sridhar, V. H., Couzin, I. D., & Manica, A. (2017). Consistent  
260 Individual Differences Drive Collective Behavior and Group Functioning of Schooling  
261 Fish. *Current Biology*, *27*(18), 2862-2868.e7. doi:10.1016/j.cub.2017.08.004
- 262 Jutfelt, F., Sundin, J., Raby, G. D., Krång, A.-S., & Clark, T. D. (2017). Two-current choice  
263 flumes for testing avoidance and preference in aquatic animals. *Methods in Ecology*  
264 *and Evolution*, *8*(3), 379–390. doi:10.1111/2041-210X.12668
- 265 Kuhn, H. (1955, March). The Hungarian method for the assignment problem. Retrieved 18  
266 August 2018, from  
267 <https://onlinelibrary.wiley.com/doi/abs/10.1002/nav.3800020109>
- 268 Macario, A., Croft, D. P., Endler, J. A., & Darden, S. K. (2017). Early social experience shapes  
269 female mate choice in guppies. *Behavioral Ecology*, *28*(3), 833–843.  
270 doi:10.1093/beheco/ax043
- 271 Mersch, D. P., Crespi, A., & Keller, L. (2013). Tracking Individuals Shows Spatial Fidelity Is a  
272 Key Regulator of Ant Social Organization. *Science*, *340*(6136), 1090–1093.  
273 doi:10.1126/science.1234316
- 274 Mönck, H. J., Jörg, A., von Falkenhausen, T., Tanke, J., Wild, B., Dormagen, D., ... Landgraf, T.  
275 (2018). BioTracker: An Open-Source Computer Vision Framework for Visual Animal  
276 Tracking. *ArXiv:1803.07985 [Cs]*. Retrieved from <http://arxiv.org/abs/1803.07985>
- 277 Noldus, L. P. J. J., Spink, A. J., & Tegenlenbosch, R. A. J. (2013, June 10). What is a good  
278 publication to cite for EthoVision? Retrieved 21 August 2018, from  
279 <https://www.noldus.com/knowledge-base/what-good-publication-cite-ethovision>

- 280 Pérez-Escudero, A., Vicente-Page, J., Hinz, R. C., Arganda, S., & Polavieja, G. G. de. (2014).  
281 idTracker: tracking individuals in a group by automatic identification of unmarked  
282 animals. *Nature Methods*, 11(7), 743–748. doi:10.1038/nmeth.2994
- 283 Rodriguez, A., Zhang, H., Klaminder, J., Brodin, T., Andersson, P. L., & Andersson, M. (2018).  
284 ToxTrac: A fast and robust software for tracking organisms. *Methods in Ecology and*  
285 *Evolution*, 9(3), 460–464. doi:10.1111/2041-210X.12874
- 286 Savitzky, A., & Golay, M. J. E. (1964, July). Smoothing and Differentiation of Data by  
287 Simplified Least Squares Procedures. Retrieved 18 August 2018, from  
288 <https://pubs.acs.org/doi/abs/10.1021/ac60214a047>
- 289 Shi, X., Møller, J. S., Højgaard, J., Johansen, J. L., Steffensen, J. F., Liu, D., & Domenici, P.  
290 (2017). The angular position of a refuge affects escape responses in staghorn sculpin  
291 *Leptocottus armatus*. *Journal of Fish Biology*, 90(6), 2434–2442.  
292 doi:10.1111/jfb.13306
- 293 Tucker, M. A., Böhning-Gaese, K., Fagan, W. F., Fryxell, J. M., Moorter, B. V., Alberts, S. C., ...  
294 Mueller, T. (2018). Moving in the Anthropocene: Global reductions in terrestrial  
295 mammalian movements. *Science*, 359(6374), 466–469.  
296 doi:10.1126/science.aam9712
- 297 Tunstrøm, K., Katz, Y., Ioannou, C. C., Huepe, C., Lutz, M. J., & Couzin, I. D. (2013). Collective  
298 States, Multistability and Transitional Behavior in Schooling Fish. *PLoS Computational*  
299 *Biology*, 9(2), e1002915. doi:10.1371/journal.pcbi.1002915
- 300 Wong, B. B. M., & Candolin, U. (2015). Behavioral responses to changing environments.  
301 *Behavioral Ecology*, 26(3), 665–673. doi:10.1093/beheco/aru183  
302  
303

304 **Figures**

305

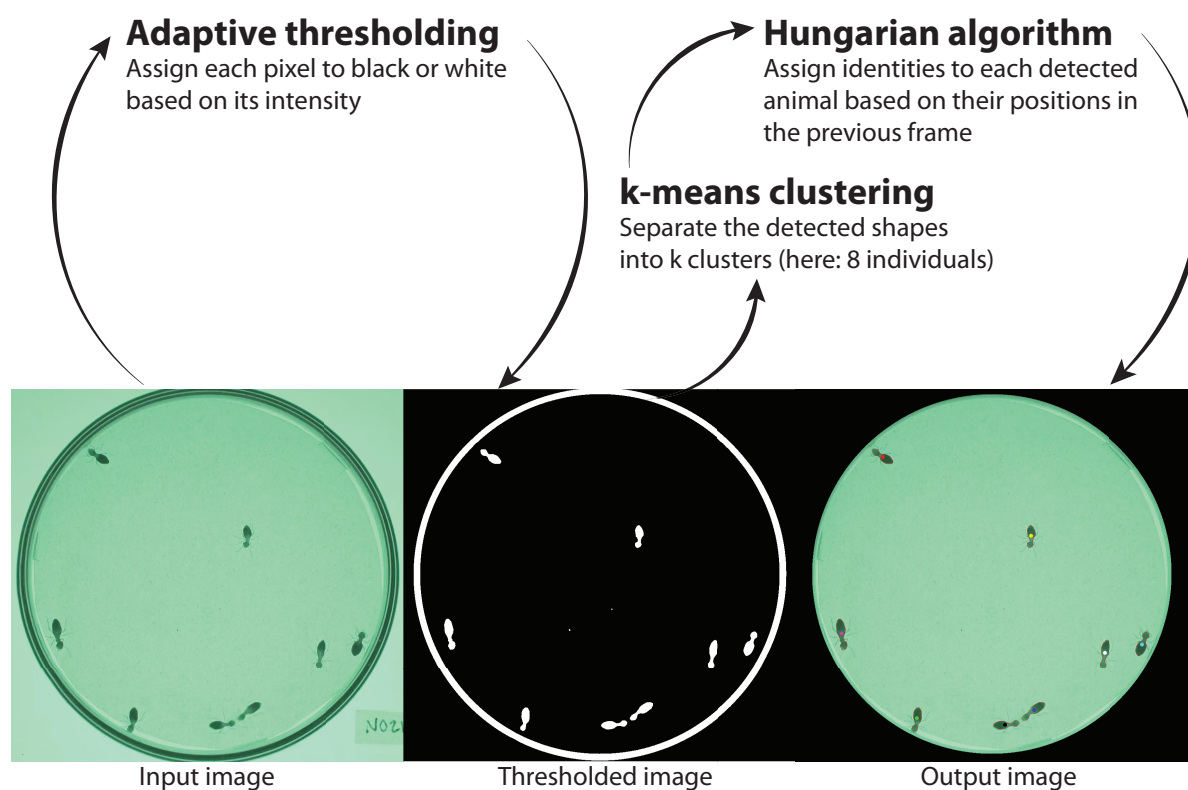

306

307

308 **Figure 1.** Overview of the different stages of the tracking procedure implemented in

309 Tracktor, illustrated here for tracking 8 termites in a petri dish (example 3.4). First, adaptive

310 thresholding is used to binarise the input image. A size rule is used to identify objects of

311 interest (here, the largest object, the petri dish, is eliminated based on the size rule).

312 Second, k-means clustering is used to separate objects if they are merged in the thresholded

313 image. Third, individual identities are assigned using the Hungarian algorithm. Some steps

314 are skipped depending on the tracking problem (e.g. k-means clustering is not implemented

315 in examples 3.1, 3.2 and 3.3). See the ESM for a more detailed description of the software

316 design.

317

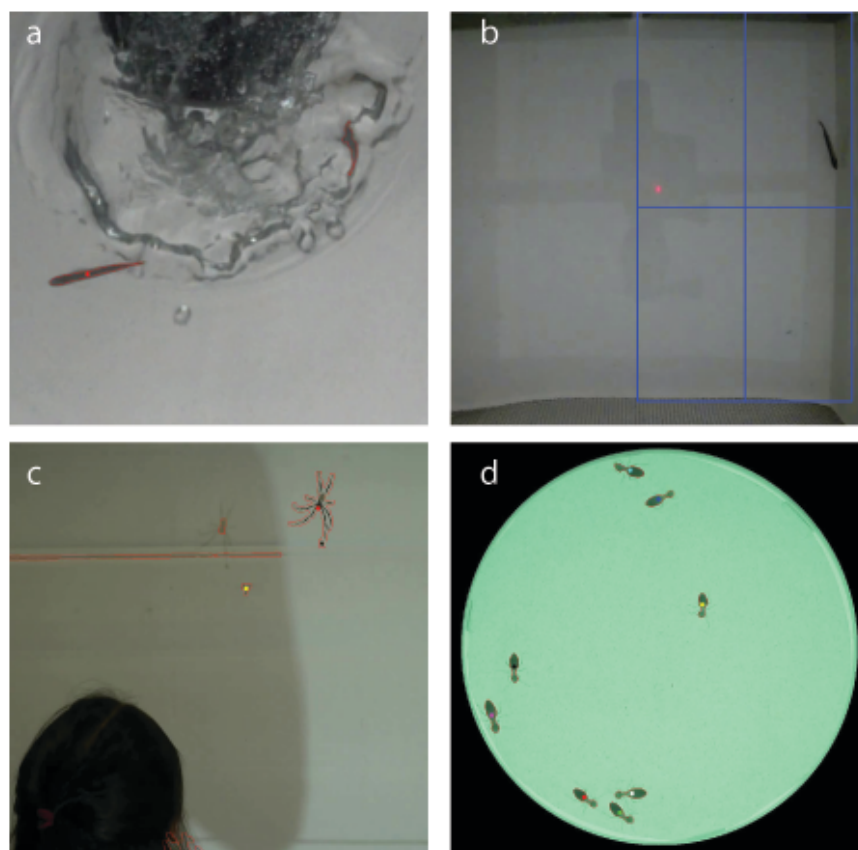

318

319

320 **Figure 2.** Examples of four different tracking problems solved with Tracktor: (a) a fast-start  
321 escape response by a single fish in an environment disturbed by a falling stimulus (example  
322 3.1); (b) a single fish in a two-choice flume experiment with the region of interest depicted  
323 as a blue rectangle (example 3.2); (c) two spiders engaging in courtship in an environment  
324 disturbed by the experimenter (example 3.3); (d) collective behaviour of eight termites in an  
325 undisturbed environment (example 3.4).

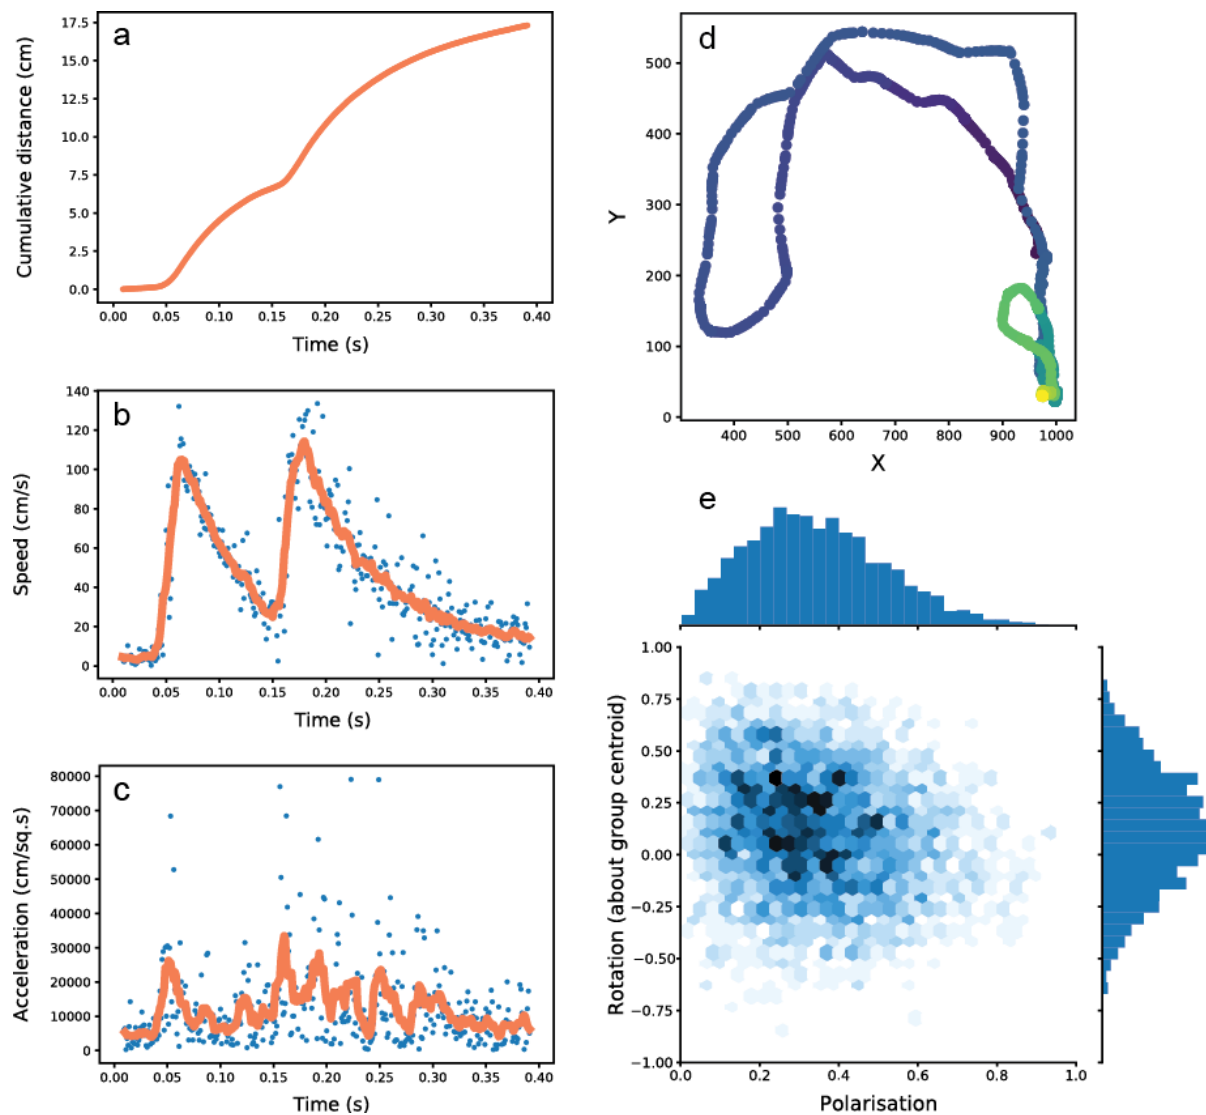

326

327

328 **Figure 3.** Example plots of summary statistics outputted by Tracktor. For the fish fast-start  
329 escape experiment (example 3.1), panels illustrate: **a)** cumulative distance covered [cm] vs.  
330 time [s], **b)** speed [ $\text{cm s}^{-1}$ ] vs. time [s], and **c)** acceleration [ $\text{cm s}^{-2}$ ] vs. time [s]. Blue dots are  
331 the raw data; orange lines represent the smoothed values of speed and acceleration using  
332 the Savitzky-Golay filter. Panel **d)** is the track [XY positions in pixels] for the flume choice  
333 experiment (example 3.2). Panel **e)** shows rotation vs. polarisation to assess the group's  
334 dynamical state in the termite collective behaviour experiment.
